# Supplementary material for: Use of commercial microwave links as scintillometers: potential and limitations towards evaporation estimation
Source: Copernicus journal article supplement (doi:10.5194/amt-18-6143-2025), 2025-11-04
Supplement: Supplementary file 1 [file amt-18-6143-2025-supplement.pdf]

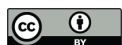

*Supplement of*

## **Use of commercial microwave links as scintillometers: potential and limitations towards evaporation estimation**

**Luuk D. van der Valk et al.**

*Correspondence to:* Luuk D. van der Valk ([l.d.vandervalk@tudelft.nl](mailto:l.d.vandervalk@tudelft.nl))

The copyright of individual parts of the supplement might differ from the article licence.

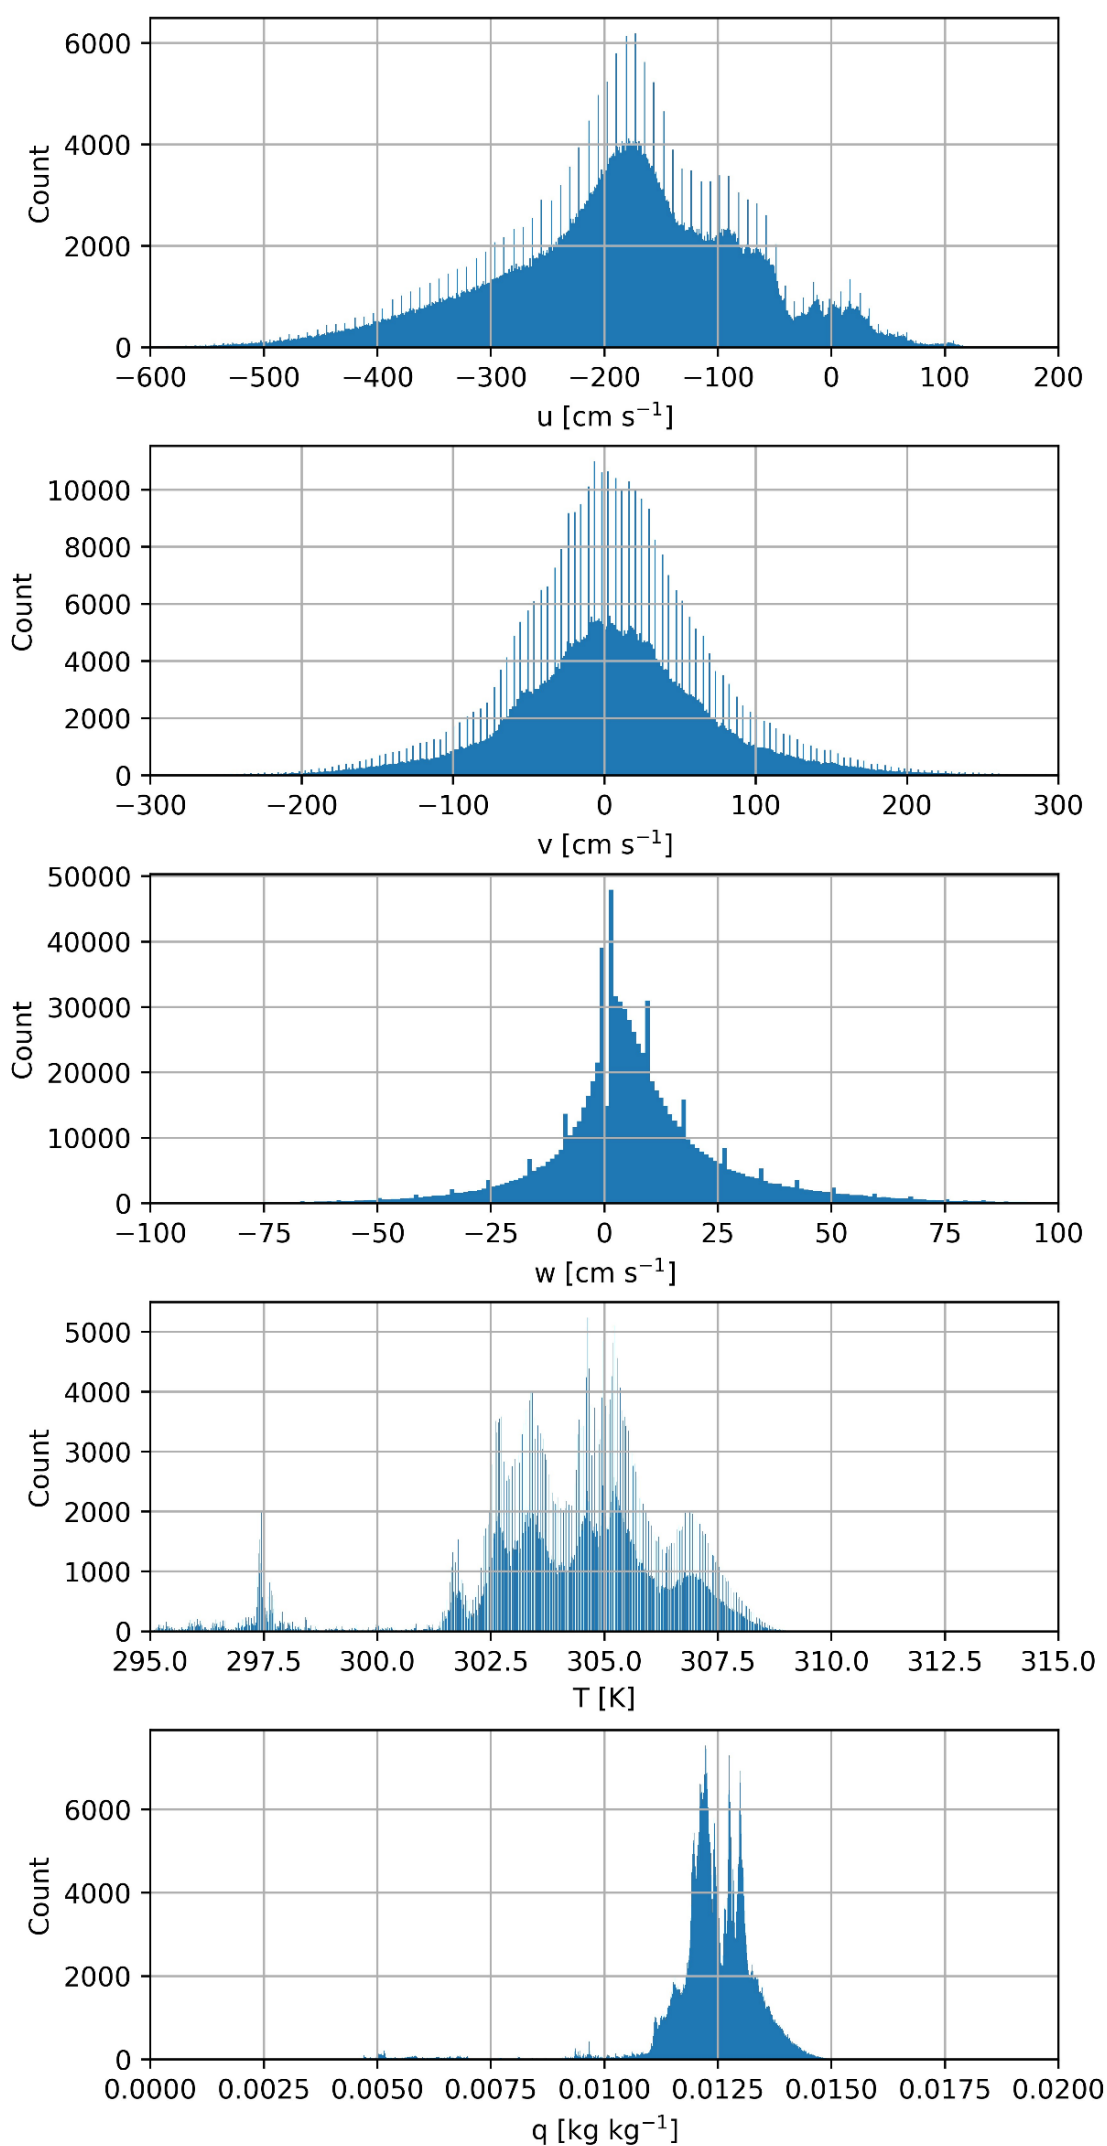

**Figure S1.** Histograms of horizontal wind speed  $u$  and  $v$ , vertical wind speed  $w$ , Temperature and specific humidity during 11 September 2023 as measured by the eddy-covariance system.
